# Supplementary material for: Widespread transcriptional pausing and elongation control at enhancers
Source: PubMed Central journal article supplement — Genes Dev. 2018 Jan 1;32(1):26–41. doi: 10.1101/gad.309351.117 (PMC5828392; doi:10.1101/gad.309351.117), 2018-01-01
Supplement: supp_gad.309351.117_Supplemental_Fig_S5.pdf [file supp_gad.309351.117_Supplemental_Fig_S5.pdf]

**A**

**Top 5 GO categories  
(mESC cells; N=583 genes)**

- Protein binding
- DNA binding
- Sequence-specific DNA binding
- Chromatin binding
- Transcription factor activity

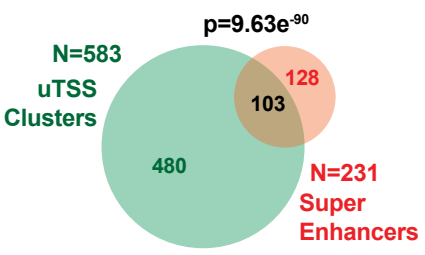

**B mRNA TSSs**

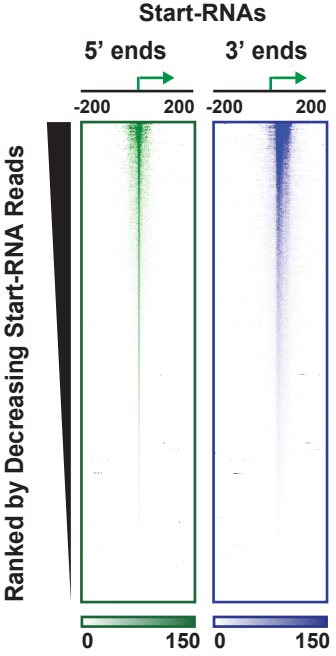

**uTSSs**

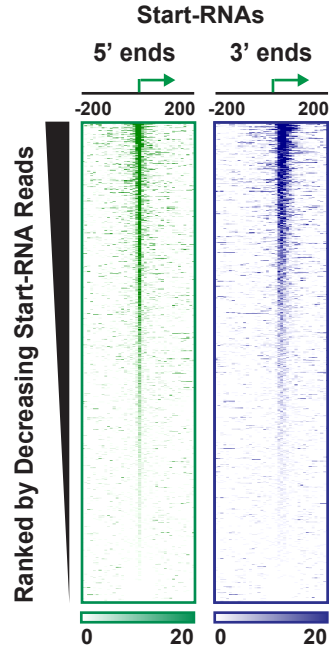

**Supplemental Figure 5. Start-RNAs document pausing at enhancers and super-enhancers. A,** (Top) List of enriched GO categories for TSS clusters containing 50 or more uTSSs in mES cells. (Bottom) Overlap between genes associated with clusters of uTSSs ( $\geq 50$ , N=583, green) and genes associated with super-enhancers (N=231, red) identified by enrichment of Med1 (Whyte et al. 2013). P-value ( $p=9.63e^{-90}$ ) from hypergeometric test. **B,** Distributions of Start-RNAs around mRNA TSSs and uTSSs in mES cells. Sites are rank ordered by decreasing Start-RNAs reads ( $\pm 50$ bp; mRNA TSSs N=15,066 genes and uTSSs N=21,763). Related to Fig. 5.
